# Supplementary material
Source: PubMed Central journal article supplement (PMC8260105)
Supplement: NIHMS1680769-supplement-supplemental_table_1.pdf [file NIHMS1680769-supplement-supplemental_table_1.pdf]

**Supplemental Table 1. Cigarette and e-cigarette purchase locations of participants <21 years of age Pre-T21 (N<sub>cig</sub> = 146; N<sub>e-cig</sub> = 193), and Post-T21 (N<sub>cig</sub> = 159; N<sub>e-cig</sub> = 134) stratified by gender, race/ethnicity, and ALA grade, among past 30-day users**

|                    | Cigarettes                              |                                          |                             |                                         |                                          |                             |                                         |                                          |                             | E-cigarettes                            |                                          |                             |                                         |                                          |                             |
|--------------------|-----------------------------------------|------------------------------------------|-----------------------------|-----------------------------------------|------------------------------------------|-----------------------------|-----------------------------------------|------------------------------------------|-----------------------------|-----------------------------------------|------------------------------------------|-----------------------------|-----------------------------------------|------------------------------------------|-----------------------------|
|                    | Did Not Buy                             |                                          |                             | Gas Station                             |                                          |                             | Convenience Store                       |                                          |                             | Did not Buy                             |                                          |                             | Vape Shop                               |                                          |                             |
|                    | <i>Pre-T21</i> ,<br>N (% <sup>b</sup> ) | <i>Post-T21</i> ,<br>N (% <sup>b</sup> ) | <i>P-value</i> <sup>a</sup> | <i>Pre-T21</i> ,<br>N (% <sup>b</sup> ) | <i>Post-T21</i> ,<br>N (% <sup>b</sup> ) | <i>P-value</i> <sup>a</sup> | <i>Pre-T21</i> ,<br>N (% <sup>b</sup> ) | <i>Post-T21</i> ,<br>N (% <sup>b</sup> ) | <i>P-value</i> <sup>a</sup> | <i>Pre-T21</i> ,<br>N (% <sup>c</sup> ) | <i>Post-T21</i> ,<br>N (% <sup>c</sup> ) | <i>P-value</i> <sup>a</sup> | <i>Pre-T21</i> ,<br>N (% <sup>c</sup> ) | <i>Post-T21</i> ,<br>N (% <sup>c</sup> ) | <i>P-value</i> <sup>a</sup> |
| Gender             |                                         |                                          |                             |                                         |                                          |                             |                                         |                                          |                             |                                         |                                          |                             |                                         |                                          |                             |
| Male               | 30 (37.0)                               | 43 (43.0)                                | 0.67                        | 37 (45.7)                               | 33 (33.0)                                | 0.91                        | 17 (21.0)                               | 23 (23.0)                                | 0.57                        | 48 (43.6)                               | 41 (50.6)                                | 0.99                        | 51 (46.4)                               | 28 (34.6)                                | 0.74                        |
| Female             | 26 (40.0)                               | 30 (50.9)                                |                             | 28 (43.1)                               | 19 (32.2)                                |                             | 13 (20.0)                               | 10 (17.0)                                |                             | 52 (62.7)                               | 36 (67.9)                                |                             | 22 (26.5)                               | 11 (20.8)                                |                             |
| Race/<br>Ethnicity |                                         |                                          |                             |                                         |                                          |                             |                                         |                                          |                             |                                         |                                          |                             |                                         |                                          |                             |
| NHW                | 24 (34.8)                               | 31 (45.6)                                | 0.68                        | 38 (55.1)                               | 21 (30.9)                                | 0.08                        | 14 (20.3)                               | 14 (20.6)                                | 0.66                        | 51 (53.7)                               | 35 (53.9)                                | 0.67                        | 34 (35.8)                               | 21 (32.3)                                | 0.34                        |
| HW                 | 28 (42.4)                               | 33 (45.2)                                |                             | 21 (31.8)                               | 25 (34.3)                                |                             | 15 (22.7)                               | 15 (20.6)                                |                             | 40 (48.8)                               | 32 (61.5)                                |                             | 33 (40.2)                               | 11 (21.2)                                |                             |
| Other              | 4 (36.4)                                | 9 (50.0)                                 |                             | 6 (54.6)                                | 6 (33.3)                                 |                             | 1 (9.1)                                 | 4 (22.2)                                 |                             | 9 (56.3)                                | 10 (58.8)                                |                             | 6 (37.5)                                | 7 (41.2)                                 |                             |
| ALA grade          |                                         |                                          |                             |                                         |                                          |                             |                                         |                                          |                             |                                         |                                          |                             |                                         |                                          |                             |
| A                  | 13 (50.0)                               | 13 (43.3)                                | 0.48                        | 12 (46.2)                               | 8 (26.7)                                 | 0.43                        | 3 (11.5)                                | 6 (20.0)                                 | 0.29                        | 13 (48.2)                               | 15 (53.6)                                | 0.92                        | 11 (40.7)                               | 9 (32.1)                                 | 0.95                        |
| C                  | 9 (40.9)                                | 8 (47.1)                                 |                             | 5 (22.7)                                | 5 (29.4)                                 |                             | 8 (36.4)                                | 3 (17.7)                                 |                             | 7 (50.0)                                | 7 (53.9)                                 |                             | 5 (35.7)                                | 3 (23.1)                                 |                             |
| F                  | 34 (34.7)                               | 52 (46.4)                                |                             | 48 (49.0)                               | 39 (34.8)                                |                             | 19 (19.4)                               | 24 (21.4)                                |                             | 80 (52.6)                               | 55 (59.1)                                |                             | 57 (37.5)                               | 27 (29.0)                                |                             |

<sup>a</sup> P-values coadjusted for gender, race/ethnicity, ALA grade, and random intercept of ID. Models assess time (Pre vs. Post-T21) by characteristic (e.g., gender) interactions from multivariate logistic regression models where purchase location (e.g., did not buy, gas station, in separate models) is the outcome.

<sup>b</sup> Respondents can report multiple purchase locations. The denominator is all cigarette users Pre- or Post-T21, respectively, stratified by demographic characteristics.

<sup>c</sup> Respondents can report multiple purchase locations. The denominator is all e-cigarette users Pre- or Post-T21, respectively, stratified by demographic characteristics.
